# Unexpected Dynamics in the UUCG RNA Tetraloop

Sandro Bottaro<sup>1,2\*</sup>, Parker J. Nichols<sup>3</sup>, Beat Vögeli<sup>3</sup>, Michele Parrinello<sup>1</sup>, Kresten Lindorff-Larsen<sup>2\*</sup>

\*For correspondence:

[sandro.bottaro@iit.it](mailto:sandro.bottaro@iit.it) (SB);  
[lindorff@bio.ku.dk](mailto:lindorff@bio.ku.dk) (KLL)

<sup>1</sup>Atomistic Simulations Laboratory, Istituto Italiano di Tecnologia, Genova, Italy; <sup>2</sup>Structural Biology and NMR Laboratory, Department of Biology, University of Copenhagen, Copenhagen, Denmark; <sup>3</sup>Department of Biochemistry and Molecular Genetics, University of Colorado Denver, Anschutz Medical Campus, Aurora, Colorado, USA.

**Abstract** Many RNA molecules are dynamic, but characterizing their motions by experiments is difficult, often requiring application of complex NMR experiments. Computational methods such as molecular dynamics simulations, on the other hand, still suffer from difficulties in sampling and remaining force field errors. Here, we provide an atomic-level description of structure and dynamics of the 14-mer UUCG RNA stem-loop by combining molecular dynamics simulations with exact nuclear Overhauser enhancement data. The integration of experiments and simulation via a Bayesian/Maximum entropy approach enables us to discover and characterize a new state of this molecule, which we show samples two distinct states. The most stable conformation corresponds to the native, consensus three-dimensional structure. The second, minor state has a population of 11%, and is characterized by the absence of the peculiar non-Watson-Crick base pair between U and G in the loop region. By using machine learning techniques, we identify key contacts in the NOESY spectrum that are compatible with the presence of the low-populated state. Together, our results demonstrate the validity of our integrative approach to determine the structure and thermodynamics of conformational changes in RNA molecules.

## INTRODUCTION

RNA loops are structural elements that cap A-form double helices, and as such are fundamental structural units in RNA molecules. The great majority of known RNA loops contain four nucleotides [1], and these so-called tetraloops are one of the most common and well-studied RNA three-dimensional motifs [2]. The great majority of known RNA tetraloops have the sequence GNRA or UUCG, where N

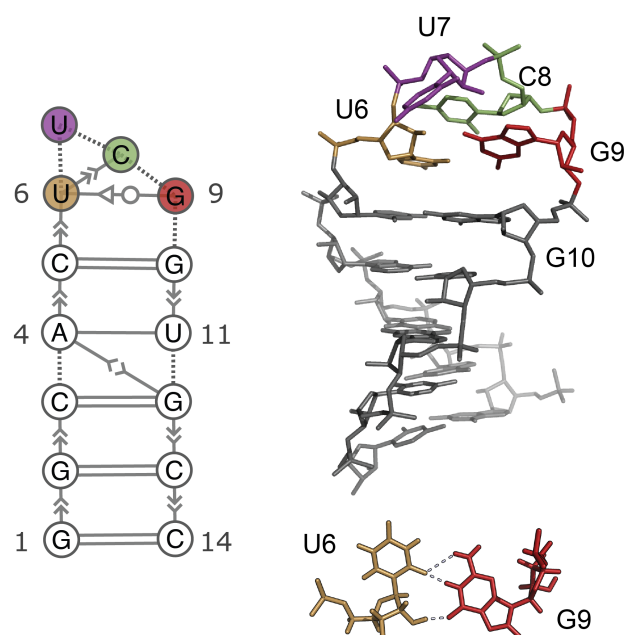

**Figure 1.** Consensus secondary structure (left) and three dimensional structure (right) of the UUCG tetraloop [6]. The stem is formed by 5 consecutive Watson-Crick base-pairs capped by the loop U6-U7-C8-G9. One of the most distinctive feature of this structure is the trans-Sugar-Watson interaction between U6 and G9 (bottom). Extended secondary structure annotation follows the Leontis-Westhof nomenclature [8]

35 is any nucleotide and R is guanine or adenine. Their small size, together with  
36 their biological relevance, has made these systems primary targets for nuclear  
37 magnetic resonance (NMR) spectroscopy, X-ray-crystallography, and atomistic  
38 molecular dynamics (MD) simulation studies [3, 4, 2].

39 The UUCG tetraloop has been long known to be highly stable, and both crystal-  
40 lographic and NMR studies suggest that this tetraloop adopts a well-defined three  
41 dimensional structure [5, 6] (Fig. 1). Experimentally, the UUCG tetraloop is used  
42 to stabilize the secondary structure of larger RNA molecules without interacting  
43 with other RNAs or proteins [7].

44 Despite its stability, the UUCG tetraloop is not rigid. In particular, three re-  
45 cent studies by independent groups indicate the presence of alternative loop  
46 conformations [9, 10, 11]. Earlier NMR studies [6, 12] also suggested the presence  
47 of loop dynamics, without providing a detailed structural interpretation of the  
48 data. More generally, the atomic-detailed characterization of RNA structure and  
49 dynamics requires specialized techniques and substantial experimental effort, in-  
50 cluding NMR measurements of nuclear Overhauser effects (NOE), scalar couplings,  
51 chemical shifts, residual dipolar couplings, cross-correlated relaxation rates as  
52 well as a wide range of relaxation-dispersion type NMR experiments [13, 14].

53 While NOEs are typically used to determine RNA and protein structures, they

also contain dynamic information. Because ensemble-averaged NOEs are highly sensitive to the underlying distance fluctuations, they may contain contributions even from minor populations. Normally, such information is difficult to extract because standard NOE measurements are relatively inaccurate. It has, however, been demonstrated that a substantial part of the information content inherent to these probes can be obtained from exact NOE measurements (eNOEs) [11]. As opposed to conventional NOEs, eNOEs can be converted into tight upper and lower distance limit restraints [15, 16, 17].

Previous computational studies of the UUCG tetraloops focused either on the dynamics around the near-native state [18] or on the difficulty in separating force-field inaccuracies from insufficient sampling [19, 20]. In a previous study we reported converged free-energy landscape for RNA 8-mer and 6-mer loops, and we have shown that native-like states are not the global free-energy minimum using the current AMBER RNA force-field [21]. This problem has been addressed in a new parameterization of the AMBER force-field, that improves the description of the UUCG 14-mer and other RNA systems [22]. Nevertheless, it remains difficult to assess the accuracy of these simulations, because experiments alone do not provide an atomic-detailed description of structure and dynamics that serve as a benchmark.

Here, we use extensive atomistic MD simulations to map the conformational landscape of the UUCG tetraloop using enhanced sampling techniques and a recent force-field parameterization. To further improve the description of this system, we perform an a posteriori refinement of the MD simulation using eNOE data via a Bayesian/maximum entropy procedure [23, 24]. By construction, the refined ensemble shows better agreement with eNOE relative to the original MD simulation. We validate the eNOE-refined ensemble against independent NMR measurements, and we find an agreement that is on average comparable with NMR structures of the UUCG tetraloop deposited in the Protein Data Bank (PDB).

Our experimentally-refined ensemble reveals the presence of two conformational states. The dominant, major state (here called state A) is the consensus UUCG structure shown in Fig. 1. The second, previously unreported lowly-populated state (state B) is characterized by the absence of the signature U6-G9 non-Watson-Crick base pair, with the G9 base exposed into solution. The salient features of state B are identified using a technique adapted from the field of machine learning called harmonic linear discriminant analysis (HLDA) [25]. Among all possible proton-proton distances, we identify specific contacts between C8 and G10 that are present in state B but not in state A. We inspect the NOESY spectrum for such contacts in order to provide independent evidence for the presence of the low-populated state.

The paper is organized as follows: we first compare the predictions obtained from MD simulation against different experimental datasets. We then discuss the

95 effect of the refinement procedure, showing how it improves the agreement with  
96 experiments and how it affects the population of different conformations. We pro-  
97 ceed by identifying the relevant degrees of freedom and contacts that characterize  
98 the two states. Finally, we identify peaks in the NOESY spectrum corresponding  
99 to contacts that are present in state B but not in state A. We accompany this  
100 paper with the commented code, in form of Jupyter notebooks, to reproduce step-  
101 by-step the complete analysis, including all figures and supplementary results  
102 presented in the manuscript.

## 103 Results

### 104 MD simulations and comparison with experimental data

105 We simulate the RNA 14-mer with sequence GGCACUUCGGUGCC starting from a  
106 completely extended conformation. Studying the folding free-energy landscape  
107 of this system is computationally expensive: for this reason previous attempts  
108 required  $\mu s$ -long simulations in combination with tempering protocols [22, 26, 27].

109 Here, we combine two enhanced sampling techniques: solute tempering in the  
110 REST2 formulation [28] and well-tempered metadynamics [29]. We used a nucleic-  
111 acid specific metric, called eRMSD, [30] as a collective variable for enhanced  
112 sampling. The MD simulation setup and convergence analysis are presented in  
113 supporting information 1 (SI1).

114 Before describing the conformational ensemble provided by MD, we com-  
115 pare the computational prediction with available NMR spectroscopy data. More  
116 precisely, we consider the following experimental datasets:

- 117 • **Dataset A.** Exact eNOEs [11], consisting in 62 bidirectional exact NOE,  
118 177 unidirectional eNOE and 77 generic normalized eNOE (gn-eNOE). This  
119 dataset alone was used to determine the structure of the UUCG tetraloop  
120 with PDB accession codes 6BY4 and 6BY5. In addition to the original dataset,  
121 we added 1 new eNOE and 6 new gn-eNOEs, as described in SI2.
- 122 • **Dataset B.** 97  $^3J$  scalar couplings, 31 RDCs and 250 NOE distances. This data,  
123 among other NMR measurements, was used to calculate the consensus  
124 UUCG tetraloop structure (PDB 2KOC [6]).
- 125 • **Dataset C.** 38 (RDC1) plus 13 (RDC2) residual dipolar couplings. These RDCs  
126 have been used in conjunction with MD simulations to obtain a dynamic  
127 ensemble of the UUCG tetraloop. [9].
- 128 • **Dataset D.** 91 solvent paramagnetic resonance enhancement (sPRE) mea-  
129 surements [10].

130 The grey bars in Fig. 2 show the agreement between simulation and the dif-  
131 ferent experimental datasets. The agreement with NOE and  $^3J$  scalar couplings

is expressed using the reduced  $\chi^2$  statistics, defined as the average square difference between the experimental measurement ( $F^{exp}$ ) and the back-calculated ensemble average ( $\langle F(\mathbf{x}) \rangle$ ) normalized by the experimental error  $\sigma$ :

$$\chi^2 = \frac{1}{m} \sum_i^m \frac{(\langle F(\mathbf{x}) \rangle_i - F_i^{EXP})^2}{\sigma_i^2} \quad (1)$$

Hence, the lower the  $\chi^2$ , the better the agreement. As a rule of thumb,  $\chi^2 < 1$  can be considered small, as the difference between experiment and prediction is within experimental error. For RDC and sPRE we calculate the Spearman correlation coefficient ( $\rho$ ), that approaches the value of 1 when experimental measurement and computational prediction are perfectly correlated. See SI2 for additional details on this comparison.

As a reference, we report in Fig. 2 the agreement calculated on the PDB ensembles 6BY5 [11] and 2KOC [6]. For bidirectional eNOE and gn-eNOE, the agreement of the MD with experiment is considerably poorer than the one calculated on 6BY5. We recall that this latter ensemble was determined by fitting dataset A, we thus expect  $\chi^2$  to be small in this case. On datasets B, C, and D, all different ensembles behave similarly. When considering other statistics (e.g. root mean square error, Pearson correlation, number of violations), the same conclusions apply. Note that  $\chi^2$  for  $^3J$  couplings is large in all cases. This discrepancy may arise both from the imperfect ensembles as well as from the limitation of the function used to calculate the experimental quantity from the atomic positions (i.e. the forward model). As an example, the parameters in the Karplus equation for HCO couplings critically depend on a single experimental data point measured in 1969 [31].

## Bayesian/Maximum entropy refinement of the MD ensemble

As described above, our MD simulation provide a conformational ensemble consisting of a rich and diverse set of conformations, that, however, do not match all experimental data perfectly, especially when considering dataset A. On the other hand, the 6BY5 ensemble matches the eNOE data remarkably well, but may underestimate the dynamics of the tetraloop.

In order to improve the description provided by the MD simulation, we calculate a refined conformational ensemble by a posteriori including experimental information into simulations. In brief, the refinement is obtained by assigning a new weight to each MD snapshot, in such a way that the averages calculated with these new weights match a set of input (or “training”) experimental data within a given error. Among all the possible solutions to this underdetermined problem, we use the one that maximize the Shannon cross-entropy [32, 33].

Here, we refine the simulation by using dataset A as a training set, while datasets B–D serve for cross-validation (see also SI3). By construction, the refine-

ment procedure improves the agreement on the training data (dataset A). We choose the free hyper-parameter of the algorithm as the one that maximize the agreement on the validation datasets.

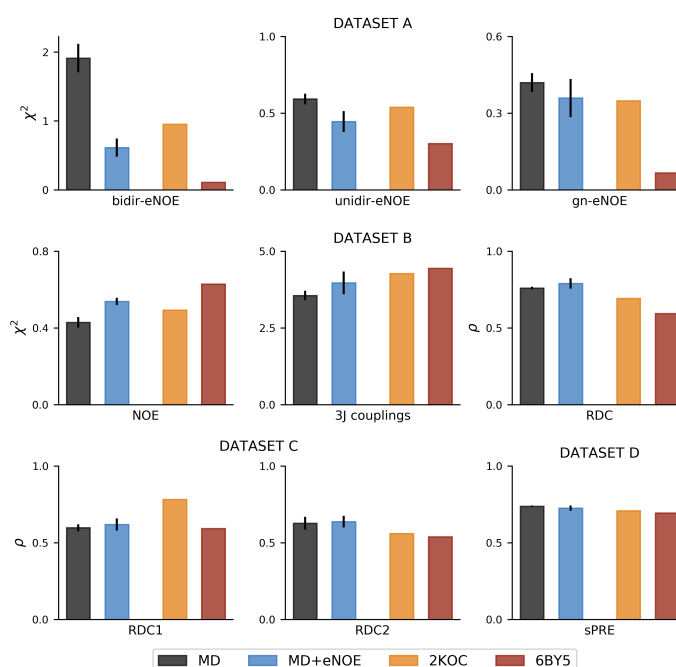

**Figure 2.** Comparison between experiment and conformational ensembles. We consider four ensembles (MD, MD+eNOE, 2KOC and 6BY5) on nine different experimental datasets. Agreement is expressed using  $\chi^2$  (NOE and  $^3J$  scalar couplings) and by the Spearman correlation coefficient  $\rho$  (RDC and sPRE). Error bars show the standard error estimated using four blocks.

Taken together, our results show that the refined ensemble (MD+eNOE) fits all available experimental data to a degree that is comparable to the one calculated from PDB structures 2KOC and 6BY5 (Fig. 2).

## Free energy landscape

In this section we analyze in detail the MD+eNOE ensemble, and discuss the differences with respect to the original simulation and previously determined structures. We consider the free energy surface projected along the distance from the consensus structure (PDB 2KOC). Distances are measured using the eRMSD, a nucleic-acid specific metric that takes into account both position and orientations between nucleobases [30]. The free energy surface projected onto the distance from the fully-formed stem (residues 1-5 and 10-14) in Fig. 3a shows a single global minimum around eRMSD=0.5. This indicates that in the global free-energy minimum all five Watson-Crick base-pairs are formed. As a rule-of-thumb, two

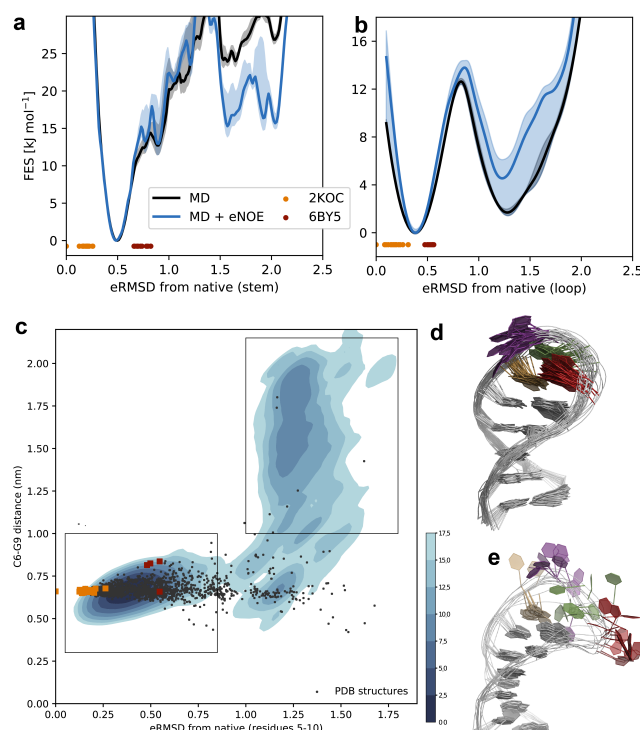

**Figure 3.** **a)** Free energy surface projected on to the eRMSD from native stem (residues 1-5 and 10-14). The eRMSD from native of 2KOC and 6BY5 are indicated as dots. **b)** Free energy surfaces projected onto the loop eRMSD (residues 5-10). Shades show the standard error estimated using four blocks. **c)** Two-dimensional free energy surface of the experimentally-refined MD simulations projected onto the eRMSD from native loop and onto the distance between the center of the six-membered rings in C6 and G9. Isolines are shown every 2.5 kJ/mol. The rectangles show the regions defining state A and state B. **d)** Representative state A conformations. **e)** Representative state B conformations.

structures with  $\text{eRMSD} \leq 0.7$  are typically very similar one to another, and share the same base-pair and stacking patterns [30, 34].

When considering the loop region only (Fig. 3b) there exist two distinct minima. The global minimum on the left (state A) corresponds to the consensus loop structure. Both 2KOC and 6BY5 structures lie in the vicinity of this minimum. The other minimum is a different loop conformation (state B) in which this non-canonical base pair is not present.

The picture emerging from the combination of MD simulations and eNOE is summarized in Fig. 3c, showing the free energy landscape projected onto the distance from native and onto the C6-G9 distance. The global free energy minimum is the native state A, with all the Watson-Crick base pairs in the stem formed together with the signature trans-sugar-Watson base pair between U6 and G9 (Fig. 3d). In state A, U7 is free to fluctuate into the solvent. In state B (Fig. 3e) all Watson-Crick base-pairs are formed, but the loop presents significant differences



with respect to state A: the U6-G9 interaction is lost, and G9 is flipped out (Fig. 3e). From the regions defined in Fig. 3c we estimate a population of  $84 \pm 7\%$  for state A and  $11 \pm 6\%$  for state B, corresponding to a free energy difference of  $-5.7 \pm 2.9$  kJ/mol.

On top of the free-energy surface, in Fig. 3c we plot the two tetraloop structures 2KOC and 6BY5. Both ensembles fall within our definition of state A. Note also that the original experimental study described the presence of two sub-states in 6BY5, that can be distinguished along the  $y$  projection. In addition, we extract from the PDB all stem-loop structures with sequence NNUUCGNN as described previously [2]. These structures, when projected on the surface in Fig. 3, are spread in different regions of the free-energy landscape. Experimentally solved tetraloops are subject to a variety of perturbations, including crystal packing, different buffer conditions or tertiary interactions. It has been shown in the case of proteins and nucleic acids that these perturbations are compatible with the equilibrium fluctuations [35, 36], and Fig. 3c is consistent with this picture. Note that a handful of PDB structures with sequence UUCG fall into the state B region. While it would be tempting to use this fact to support the existence of state B, we noticed that these hits all belong to solvent-exposed regions in cryo-electron microscopy structures.

## Describing state B using harmonic linear discriminant analysis.

Having discovered this new B-state, we proceed to analyse its structural features and seek for experimental validation. While the main global minimum is known and structurally well-defined, it is not trivial from a simple visual inspection to identify which are the main structural features distinguishing the two loop conformations. Here, we address this question by using the harmonic linear discriminant analysis (HLDA), a variant of the linear discriminant analysis (LDA) [37]. LDA is routinely used in the field of data science and machine learning to find a linear combination of descriptors that best separates two or more classes. This idea has been applied for analysing complex transitions in biomolecular simulations [38, 39], and HLDA has successfully been used as biased collective variables to enhance sampling [25, 40, 41].

Here, we are interested in finding the most relevant descriptors (degrees of freedom) that discriminate the two states. To this end, we perform HLDA considering as descriptors a cosine function of the dihedral angles  $\alpha, \beta, \gamma, \delta, \epsilon, \zeta, \chi$  in the 14-mer (see Methods section).

We show in Fig. 4 the coefficients of the non-zero eigenvector. The larger in magnitude the coefficient, the more important the corresponding descriptor in the linear combination. The largest coefficients are localized in nucleotides C8 and G9, both belonging to the loop region (Fig. 1). Indeed, the distribution of the descriptor with the highest coefficient ( $\zeta$  in C8) has two distinct peaks. This angle is in the gauche+ (g+) conformation in the native state, and we find the alternative



239 loop conformation to adopt the gauche- (g-) rotameric state. The  $\chi$  angle in G9 is  
240 not among the highest-ranked descriptor because it is in *syn* conformation both  
in state A and in state B.

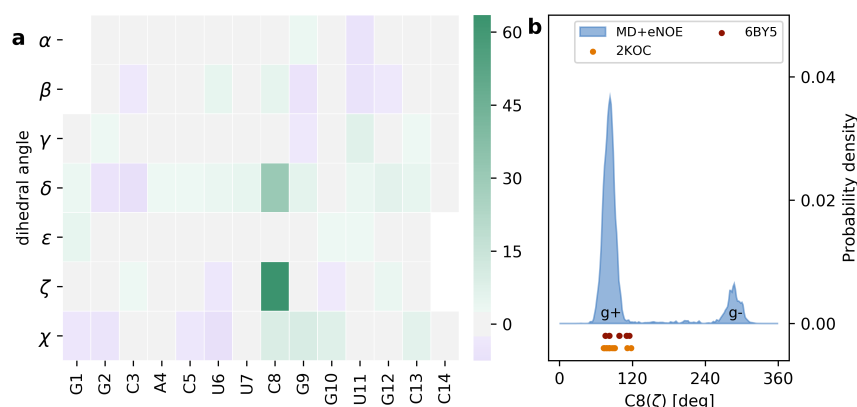

**Figure 4.** **a)** Eigenvector coefficients from HLDA using state A and B as classes and a cosine function of the torsion angles as descriptors. The larger the magnitude of the coefficient, the more relevant the angle in describing the separation between the two states.  $\zeta$  in C8 is the degree of freedom with the largest coefficient. **b)** Probability distribution of the  $C8(\zeta)$  calculated on the MD+eNOE ensemble, together with the values from the PDB structures 2KOC and 6BY5.

241

242 HLDA also makes it possible to address a different question: which distances  
243 that are short in state B but not in state A – and vice-versa – would be measurable  
244 by eNOEs? To this end, we consider all the H-H inter-nucleotide distances in the  
245 14-mer whose calculated NOE-derived distance is smaller than 6Å. We obtain  
246 in this way 801 H-H distances, that we use as descriptors in HLDA. Again, the  
247 eigenvector coefficients allow us to rank the most important distances that are  
248 different in the two states. Among the highest-ranked coefficients we find several  
249 contacts between C8 and G10 that are shorter in state B compared to state A.  
250 Because NOE-derived distances are highly sensitive to distance fluctuations, in  
251 particular when measured via eNOE protocols, such B-specific contacts should be  
252 able to provide further evidence for the structure and population of the B state.

253 By inspecting the NOE spectrum for the presence of C8-G10 contacts, we  
254 identify several NOE that were not part of the original dataset [11], but are here  
255 included the training set used for ensemble refinement. In Fig. 5c we show se-  
256 lected NOE-derived distances, together with the predicted values from MD+eNOE  
257 and PDB ensembles. The first three NOEs are used as lower-distance bounds  
258 estimated from the spectral noise. Note that MD+eNOE average is at the limit  
259 of the boundary for C8 H5-G10 H1' and C8 H2'-G10 H8, suggesting the presence  
260 of the B state to be overestimated in our refined ensemble. The contact C8-H4'  
261 to G10-H8 is less informative, as the corresponding eNOE matches the experi-  
262 mental value both in A and B states. Note that the presence of the B-state is

compatible with short contacts between G9 and U6, that are satisfied even if the GU base-pairs is not formed at all times (Fig. 5c,d). The NOE spectrum shows a peak corresponding to the C8 H1' to G10 H8, that overlaps with G9 H1' to G10 H8 (Fig. 5b). The combined signal is compatible with the distances sampled in the MD+eNOE, but incompatible with 2KOC. Note that this new eNOE is also satisfied in the 2-state ensemble 6BY5.

An additional argument supporting the presence of the B-state is provided by sPRE data. In the original paper [10], the authors measured unusually large calculated sPRE in G9-H1 and U6-H3, corresponding to a larger than expected solvent accessibility of these atoms, and observed that these values could not be explained from available PDB structures. In our MD+eNOE ensemble we observe a large G9-H1 sPRE, in agreement with experiments (see also SI4). At variance with experimental evidence, we do not predict large sPRE for U6-H3. Different reasons may contribute to this discrepancy: the lack of U6 dynamics in simulations, inaccuracies in the empirical model employed to calculate sPRE from structures, or solvent-exchange effects [42]. Conversely, on-resonance  $^{13}\text{C}$   $R_1\rho$  relaxation dispersion experiments on a UUCG tetraloop with a different stem sequence showed no significant exchange contributions, indicating the absence of motions with substantial chemical shift variation in the  $\mu$ -ms timescale [43].

## Conclusions

Based on our extensive MD simulations and integrating them with exact NOE data, we report the free energy landscape of a prototype stem-loop RNA 14-mer known as the UUCG tetraloop. The main finding of the present study is the previously unreported presence of a non-native free-energy minimum with an estimated population of  $11\% \pm 6\%$ . The low-populated state differs from the known structure only in the loop region, and it is characterized by the absence of the tSW base-pair between C6 and G9, with the latter nucleotide partially exposed into solution. This result has been obtained by using atomistic MD simulations and eNOE, without the need of additional data.

The free-energy surfaces and estimated population provided here are based on the available experimental data, on the employed model, and the extent of our sampling. Therefore, they are subject to inaccuracies. However, both simulations and eNOE data are consistent with the presence of the B state as described in this paper. This interpretation is qualitatively consistent with several NMR studies, that also suggested the presence of dynamics in G9 [12, 6, 10]. Note also that G9-exposed structures were reported in previous MD simulations [26, 20, 44], suggesting our finding to be robust with respect to the choice of the force-field and water model.

In order to further test our findings, it could be useful to perform dedicated

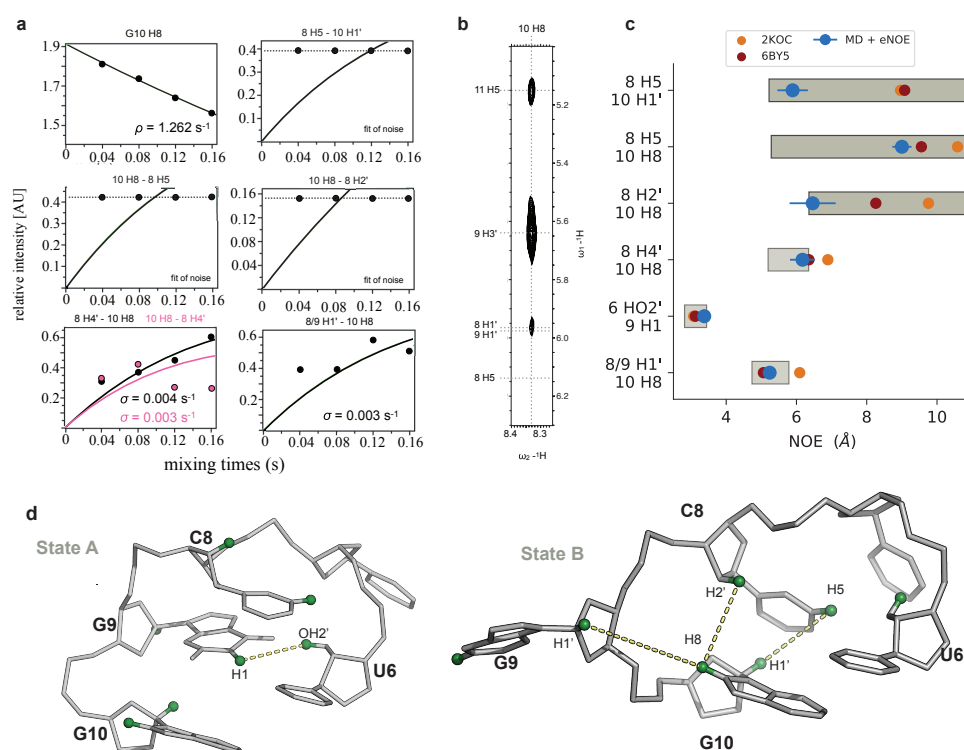

**Figure 5.** **a)** NOESY diagonal decay and cross peak buildup curves are shown for spin pairs with significantly shorter distances in the B state than in the A state. There is no visible cross peak in the spectrum corresponding to some of the proton pairs. In these cases the horizontal broken line showing the spectral noise puts an upper limit on the peak intensities. The NOESY series was recorded as described in [11]. **b)** Strip of the NOESY spectrum at maximum mixing time showing buildup cross peaks caused by the magnetization transfers to 10 H8. **c)** Calculated and experimental NOE for selected proton-pairs. The average from the MD+eNOE simulation ensemble is shown in blue, and the experimental measure is shown in gray. Red and orange shows the eNOE calculated from the 6BY5 and 2KOC ensembles. For 8 H5 - 10 H8, 8 H5 - 10 H1', 8 H2'-10 H8, the bar shows the allowed range as derived from the spectral noise. **d)** Comparison between A and B state in the loop region. Short-range contacts between C8 and G10 are possible when G9 is bulged out.

experiments probing long-timescale dynamics such as R1 $\rho$  [43] or chemical exchange saturation transfer experiments.

In this work we have used eNOEs to reweight a posteriori the ensemble generated via enhanced sampling MD simulations. This refinement procedure is a post-processing approach [23, 24] that is in principle less powerful compared to on-the-fly methods that samples directly from the target probability distribution [45]. Refinement, however, is computationally cheap, as such one can easily experiment by trying different combinations of training/cross-validation sets, and to include new data when they become available. Here we have taken advantage of this property, and we used the refined ensemble to make predictions and to

312 suggest new experiments.

313 In order to identify the experimental measurement to probe the existence  
314 of state B, we resorted to a variant of the linear discriminant analysis, a method  
315 adapted from the field of machine learning. HLDA provides a concise way to  
316 interpret differences between biomolecular conformations that cannot be easily  
317 summarized in terms of a small number of collective variables [46, 47].

318 During the course of this study we have attempted to refine the simulation by  
319 matching RDC data (datasets B and C), but this resulted in a decreased agreement  
320 with other datasets. We have observed a similar behaviour when using sPRE  
321 (dataset D) for refinement. Instead, enforcing the agreement with eNOE (dataset  
322 A) marginally affects the agreement with other datasets (Fig. 2 and SI2). Different  
323 reasons can contribute to this behaviour. First, we do not expect all experimental  
324 data to be perfectly compatible one with the other, because measurements were  
325 conducted in similar, but not identical conditions. Second, the forward models  
326 might not be accurate for arbitrary molecular conformation. For example, if the  
327 forward model can accurately predict the RDC given the native structure, but fails  
328 on unfolded/misfolded conformations, we obtain artefacts that cannot be easily  
329 accounted for in our refinement procedure. Note that this problem is typically less  
330 relevant when using experimental RDC, sPRE or chemical shift data for scoring  
331 structures [48, 43, 10].

332 Finally, we note that the approach taken here is general and it is applicable  
333 to other RNA or protein systems [49, 50]. Previous characterization of slow,  
334 larger motions in RNA molecules have mostly relied on relaxation-dispersion,  
335 chemical exchange saturation transfer or related NMR experiments that probe  
336 chemical shift differences between different conformational states. We hope  
337 that the integration of MD simulations and eNOE measurements provides further  
338 opportunities for characterizing the free energy landscapes of RNA molecules.

## 339 Acknowledgements

340 The research is funded by a grant from The Velux Foundations (S.B. and K.L.-L.),  
341 the Lundbeck Foundation BRAINSTRUC initiative (K.L.-L.), a start-up package from  
342 the University of Colorado (B.V.), and by NSF grant 1917254 for Infrastructure  
343 Innovation for Biological Research (B.V.). The authors thank Giovanni Bussi for  
344 helpful comments. We also thank Tobias Madl, Harald Schwalbe, and coworkers  
345 for useful discussions and for sharing their data.

## 346 Methods

### 347 Integrating MD simulation and experimental data

348 We combine the MD simulation with experimental data using a maximum en-  
349 tropy/Bayesian procedure [33, 51, 23]. In our previous work, we have described

350 this reweighting procedure as Bayesian/MaxEnt (BME) [52, 24] . In BME we use  
 351 the experimental data to modify a posteriori the simulation so that the new con-  
 352 formational ensemble has the following properties: (i) the calculated averages  
 353 are close to the experimental values taking uncertainty into account and (ii) it  
 354 maximizes the relative Shannon entropy with respect to the original simulation  
 355 ensemble. The modification comes in the form of a new set of weights  $w_j^*$ , one  
 356 for each simulation frame.

357 It can be shown that this problem can be cast as a minimization problem, in  
 358 which one seeks the minimum of the function  $\Gamma$  with respect to the set of Lagrange  
 359 multipliers  $\bar{\lambda} = \lambda_1 \dots \lambda_m$ , with  $m$  being the number of experimental constraints.

$$\Gamma(\bar{\lambda}) = \log(Z(\bar{\lambda})) + \sum_i^m \lambda_i F_i^{\text{exp}} + \frac{\theta}{2} \sum_i^m \lambda_i^2 \sigma_i^2 \quad (2)$$

360 Here,  $\sigma_i$  are the uncertainties on the experimental measurements  $F_i^{\text{exp}}$  and  
 361 include experimental errors and inaccuracies introduced by the calculation of the  
 362 experimental quantity from the atomic positions ( $F(\mathbf{x})$ ).  $\theta$  is a free parameter,  
 363 while the partition function  $Z$  is defined as

$$Z(\bar{\lambda}) = \sum_{j=1}^n w_j^0 \exp[-\sum_i^m \lambda_i F_i(\mathbf{x}_j)] \quad (3)$$

364 The sum over the index  $j$  runs over the  $n$  frames in the simulation, and  $w_j^0$   
 365 are the original weights.  $w^0 = 1/n$  when using plain MD simulations or enhanced  
 366 sampling techniques that sample directly from the target distribution (e.g. parallel  
 367 tempering). In this paper we use WT-METAD, and the original weights  $w^0$  are  
 368 estimated using the final bias potential [53]. The minimization of Eq. 2 yields a set  
 369 of Lagrange multipliers  $\bar{\lambda}^*$  that are used to calculate the optimal weights

$$w_j^* = \frac{1}{Z(\bar{\lambda}^*)} w_j^0 \exp[-\sum_i^m \lambda_i^* F_i(\mathbf{x}_j)] \quad (4)$$

370 In the context of the UUCG tetraloop, we use the dataset A described in the  
 371 previous section to refine the simulation ensemble, and cross-validate the results  
 372 against datasets B, C, and D. Details on the comparison between simulations  
 373 and experiments, on the BME procedure and on the choice of the regularization  
 374 parameter  $\theta$  can be found in SI 2,3, and 4.

### 375 Harmonic linear discriminant analysis (HLDA)

376 In HLDA, the goal is to find the projection  $\mathbf{W}$  that maximize the degree of separa-  
 377 tion between  $M$  classes in the  $N$  dimensional space of the descriptors [41]. The  
 378 separation is measured by the ratio

$$J(\mathbf{W}) = \frac{\mathbf{W}^T \mathbf{S}_b \mathbf{W}}{\mathbf{W}^T \mathbf{S}_w \mathbf{W}} \quad (5)$$

Where the between classes  $\mathbf{S}_b$  and within class  $\mathbf{S}_w$  scatter matrices are defined as

$$\mathbf{S}_w = \left[ \sum_i^M \Sigma_i^{-1} \right]^{-1} \quad \mathbf{S}_b = \sum_i^M (\mu_i - \bar{\mu})(\mu_i - \bar{\mu})^T \quad (6)$$

Here,  $\mu_i, \Sigma_i$  are the mean and covariance of the  $i^{th}$  class and  $\bar{\mu}$  is the overall average. The maximization of  $\mathcal{J}(\mathbf{W})$  under the constraint  $\mathbf{W}^T \mathbf{S}_w \mathbf{W} = 1$  can be cast to an eigenvalue problem of the form

$$\mathbf{S}_b \mathbf{W} = \lambda \mathbf{S}_w \mathbf{W} \quad (7)$$

Note that there are  $M - 1$  non-zero eigenvalues, and in the simplest case of  $M = 2$ , the eigenvector corresponding to the only non-zero eigenvalue is given by

$$\mathbf{W}^* = \mathbf{S}_w^{-1} (\mu_A - \mu_B) \quad (8)$$

The magnitude and sign of the components  $\mathbf{W}^* = \{W_1^* \dots W_N^*\}$  carry information on the importance of the different descriptors. The larger the absolute value of the coefficient, the more relevant is the corresponding descriptor in discriminating the states.

## References

- [1] Wolters, J. The nature of preferred hairpin structures in 16s-like rna variable regions. *Nucleic acids research* **20**, 1843–1850 (1992).
- [2] Bottaro, S. & Lindorff-Larsen, K. Mapping the universe of rna tetraloop folds. *Biophys. J.* **113**, 257–267 (2017).
- [3] Cheong, C., Varani, G. & Tinoco Jr, I. Solution structure of an unusually stable rna hairpin, 5GGAC (UUCG) GUCC. *Nature* **346**, 680 (1990).
- [4] Woese, C., Winker, S. & Gutell, R. Architecture of ribosomal rna: constraints on the sequence of "tetra-loops". *Proc. Natl. Acad. Sci. U.S.A.* **87**, 8467–8471 (1990).
- [5] Ennifar, E. *et al.* The crystal structure of UUCG tetraloop1. *J. Mol. Biol.* **304**, 35–42 (2000).
- [6] Nozinovic, S., Fürtig, B., Jonker, H. R., Richter, C. & Schwalbe, H. High-resolution nmr structure of an rna model system: the 14-mer cuucgg tetraloop hairpin rna. *Nucleic Acids Res.* **38**, 683–694 (2010).
- [7] Hall, K. B. Mighty tiny. *RNA* **21**, 630–631 (2015).
- [8] Leontis, N. B. & Westhof, E. Geometric nomenclature and classification of rna base pairs. *Rna* **7**, 499–512 (2001).



- 407 [9] Borkar, A. N., Vallurupalli, P., Camilloni, C., Kay, L. E. & Vendruscolo, M. Si-  
408 multaneous nmr characterisation of multiple minima in the free energy  
409 landscape of an rna uucg tetraloop. *Phys. Chem. Chem. Phys.* **19**, 2797–2804  
410 (2017).
- 411 [10] Hartmüller, C. *et al.* Rna structure refinement using nmr solvent accessibility  
412 data. *Sci. Rep.* **7**, 5393 (2017).
- 413 [11] Nichols, P. J. *et al.* High-resolution small rna structures from exact nuclear  
414 overhauser enhancement measurements without additional restraints. *Com-  
415 munications Biology* **1**, 61 (2018).
- 416 [12] Duchardt, E. & Schwalbe, H. Residue specific ribose and nucleobase dynamics  
417 of the cuucgg rna tetraloop motif by mnmr 13 c relaxation. *J. Biomol. NMR* **32**,  
418 295–308 (2005).
- 419 [13] Salmon, L., Yang, S. & Al-Hashimi, H. M. Advances in the determination of  
420 nucleic acid conformational ensembles. *Annu. Rev. Phys. Chem.* **65**, 293–316  
421 (2014).
- 422 [14] Marušič, M., Schlagnitweit, J. & Petzold, K. Rna dynamics by nmr. *Chem-  
423 BioChem* (2019).
- 424 [15] Vögeli, B. The nuclear overhauser effect from a quantitative perspective.  
425 *Prog. Nucl. Mag. Res. Sp.* **78**, 1–46 (2014).
- 426 [16] Nichols, P. *et al.* The exact nuclear overhauser enhancement: recent advances.  
427 *Molecules* **22**, 1176 (2017).
- 428 [17] Nichols, P. J. *et al.* Extending the applicability of exact nuclear overhauser  
429 enhancements to large proteins and rna. *ChemBioChem* **19**, 1695–1701  
430 (2018).
- 431 [18] Giambaşu, G. M., York, D. M. & Case, D. A. Structural fidelity and nmr relax-  
432 ation analysis in a prototype rna hairpin. *RNA* **21**, 963–974 (2015).
- 433 [19] Banás, P. *et al.* Performance of molecular mechanics force fields for rna  
434 simulations: stability of uucg and gnra hairpins. *J. Chem. Theory Comput.* **6**,  
435 3836–3849 (2010).
- 436 [20] Bergonzo, C., Henriksen, N. M., Roe, D. R. & Cheatham, T. E. Highly sampled  
437 tetranucleotide and tetraloop motifs enable evaluation of common rna force  
438 fields. *RNA* **21**, 1578–1590 (2015).
- 439 [21] Bottaro, S., Banas, P., Sponer, J. & Bussi, G. Free energy landscape of gaga  
440 and uucg rna tetraloops. *J. Phys. Chem. Lett.* **7**, 4032–4038 (2016).

- 441 [22] Tan, D., Piana, S., Dirks, R. M. & Shaw, D. E. Rna force field with accuracy  
442 comparable to state-of-the-art protein force fields. *Proc. Natl. Acad. Sci. U.S.A.*  
443 201713027 (2018).
- 444 [23] Hummer, G. & Köfinger, J. Bayesian ensemble refinement by replica simula-  
445 tions and reweighting. *J. Chem. Phys.* **143**, 12B634\_1 (2015).
- 446 [24] Bottaro, S., Bengtsen, T. & Lindorff-Larsen, K. Integrating molecular simu-  
447 lation and experimental data: A bayesian/maximum entropy reweighting  
448 approach. *bioRxiv* 457952 (2018).
- 449 [25] Piccini, G., Mendels, D. & Parrinello, M. Metadynamics with discriminants:  
450 A tool for understanding chemistry. *J. Chem Theory Comput.* **14**, 5040–5044  
451 (2018).
- 452 [26] Kuhrova, P., Banas, P., Best, R. B., Sponer, J. & Otyepka, M. Computer folding  
453 of rna tetraloops? are we there yet? *J. Chem. Theory Comput.* **9**, 2115–2125  
454 (2013).
- 455 [27] Chen, A. A. & García, A. E. High-resolution reversible folding of hyperstable  
456 rna tetraloops using molecular dynamics simulations. *Proc. Natl. Acad. Sci.*  
457 *U.S.A.* **110**, 16820–16825 (2013).
- 458 [28] Wang, L., Friesner, R. A. & Berne, B. Replica exchange with solute scaling: a  
459 more efficient version of replica exchange with solute tempering (rest2). *J.*  
460 *Phys. Chem. B* **115**, 9431–9438 (2011).
- 461 [29] Barducci, A., Bussi, G. & Parrinello, M. Well-tempered metadynamics: a  
462 smoothly converging and tunable free-energy method. *Phys. Rev. Lett.* **100**,  
463 020603 (2008).
- 464 [30] Bottaro, S., Di Palma, F. & Bussi, G. The role of nucleobase interactions in rna  
465 structure and dynamics. *Nucl. Acids Res.* **42**, 13306–13314 (2014).
- 466 [31] Bentrude, W. G. & Hargis, J. H. Conformations of 6-membered-ring phospho-  
467 rus heterocycles: the 5-t-butyl-2-oxo-1, 3, 2-dioxaphosphorinans. *J. Chem.*  
468 *Soc. D* 1113b–1114 (1969).
- 469 [32] Pitera, J. W. & Chodera, J. D. On the use of experimental observations to  
470 bias simulated ensembles. *Journal of chemical theory and computation* **8**,  
471 3445–3451 (2012).
- 472 [33] Boomsma, W., Ferkinghoff-Borg, J. & Lindorff-Larsen, K. Combining experi-  
473 ments and simulations using the maximum entropy principle. *PLoS Comput.*  
474 *Biol.* **10**, e1003406 (2014).

- 475 [34] Bottaro, S. *et al.* Barnaba: software for analysis of nucleic acid structures and  
476 trajectories. *RNA* **25**, 219–231 (2019).
- 477 [35] Best, R. B., Lindorff-Larsen, K., DePristo, M. A. & Vendruscolo, M. Relation  
478 between native ensembles and experimental structures of proteins. *Proc.*  
479 *Natl. Acad. Sci. U.S.A.* **103**, 10901–10906 (2006).
- 480 [36] Bottaro, S., Gil-Ley, A. & Bussi, G. Rna folding pathways in stop motion.  
481 *Nucleic acids research* **44**, 5883–5891 (2016).
- 482 [37] Fisher, R. A. The use of multiple measurements in taxonomic problems. *Ann.*  
483 *Eugen.* **7**, 179–188 (1936).
- 484 [38] Sakuraba, S. & Kono, H. Spotting the difference in molecular dynamics  
485 simulations of biomolecules. *J. Chem. Phys.* **145**, 074116 (2016).
- 486 [39] Uyar, A., Karamyan, V. & Dickson, A. Long-range changes in neurolysin  
487 dynamics upon inhibitor binding. *J. Chem Theory Comput.* **14**, 444–452 (2017).
- 488 [40] Mendels, D., Piccini, G., Brotzakis, Z. F., Yang, Y. I. & Parrinello, M. Folding a  
489 small protein using harmonic linear discriminant analysis. *J. Chem. Phys.* **149**,  
490 194113 (2018).
- 491 [41] Mendels, D., Piccini, G. & Parrinello, M. Collective variables from local fluctua-  
492 tions. *J Phys. Chem. Lett.* **9**, 2776–2781 (2018).
- 493 [42] Gong, Z., Schwieters, C. D. & Tang, C. Theory and practice of using solvent  
494 paramagnetic relaxation enhancement to characterize protein conforma-  
495 tional dynamics. *Methods* **148**, 48–56 (2018).
- 496 [43] Salmon, L. *et al.* Modulating rna alignment using directional dynamic kinks:  
497 application in determining an atomic-resolution ensemble for a hairpin using  
498 nmr residual dipolar couplings. *Journal of the American Chemical Society* **137**,  
499 12954–12965 (2015).
- 500 [44] Cesari, A. *et al.* Fitting corrections to an rna force field using experimental  
501 data. *Journal of chemical theory and computation* (2019).
- 502 [45] Bonomi, M., Heller, G. T., Camilloni, C. & Vendruscolo, M. Principles of protein  
503 structural ensemble determination. *Curr. Opin. Struct. Biol.* **42**, 106–116  
504 (2017).
- 505 [46] Brandt, S., Sittel, F., Ernst, M. & Stock, G. Machine learning of biomolecular  
506 reaction coordinates. *The journal of physical chemistry letters* **9**, 2144–2150  
507 (2018).

- 508 [47] Fleetwood, O., Kasimova, M. A., Westerlund, A. M. & Delemotte, L. Extracting  
509 molecular insights from conformational ensembles using machine learning.  
510 *BioRxiv* 695254 (2019).
- 511 [48] Sripakdeevong, P. *et al.* Structure determination of noncanonical rna motifs  
512 guided by 1 h nmr chemical shifts. *Nature Methods* **11**, 413 (2014).
- 513 [49] Escobedo, A. *et al.* Side chain to main chain hydrogen bonds stabilize polyg-  
514 lutamine helices in transcription factors. *Nat. Comm.* **10** (2019).
- 515 [50] Crehuet, R., Jorro, P. J. B., Lindorff-Larsen, K. & Salvatella, X. Bayesian-  
516 maximum-entropy reweighting of idps ensembles based on nmr chemical  
517 shifts. *BioRxiv* 689083 (2019).
- 518 [51] Beauchamp, K. A., Pande, V. S. & Das, R. Bayesian energy landscape tilting:  
519 towards concordant models of molecular ensembles. *Biophys. J.* **106**, 1381–  
520 1390 (2014).
- 521 [52] Bottaro, S., Bussi, G., Kennedy, S. D., Turner, D. H. & Lindorff-Larsen, K.  
522 Conformational ensembles of rna oligonucleotides from integrating nmr and  
523 molecular simulations. *Sci. Adv.* **4**, eaar8521 (2018).
- 524 [53] Branduardi, D., Bussi, G. & Parrinello, M. Metadynamics with adaptive gaus-  
525 sians. *Journal of chemical theory and computation* **8**, 2247–2254 (2012).
